# Supplementary material for: Preliminary Results of first Belgian Cohort of Juvenile Idiopathic Arthritis: Where Do we Stand in Terms of Quality of Care and Remission?
Source: Research Square preprint supplement (doi:10.21203/rs.3.rs-133374/v1), 2020-12-28
Supplement: Supplementary file 1 [file 8bfe8e473cdb4db3297fa9cd.docx]

**Additional Table A2.** Evolution of clinical and biologic parameters in naïve patients, from baseline visit to 18 months

|  | **Baseline visit**  **(n=25)** | **6 months**  **(n=13)** | **12 months**  **(n=11)** | **18 months**  **(n=8)** |
| --- | --- | --- | --- | --- |
| **TJC**  mean (SEM) | 1.5 (0.4) | **0.8 (0.4)** | **0.3 (0.2)** | 0.2 (0.2) |
| **SJC**  mean (SEM) | 1.7 (0.5) | 1.0 (0.4) | 0.3 (0.2) | 0.6 (0.5) |
| **Physician VAS**  mean (SEM) | 17.6 (3.7) | 9.5 (4.0) | **5.6 (2.1)** | 4.4 (3.7) |
| **Patient/parent VAS**  mean (SEM) | 14.7 (5.0) | 4.6 (3.2) | 4.3 (4.3) | 11.0 (11.0) |
| **CHAQ**  mean (SEM) | 0.4 (0.1) | 0.1 (0.1) | 0.1 (0.1) | 0 (0) |
| **CRP, mg/dL**  mean (SEM) | 11.0 (3.6) | **2.3 (0.6)** | 7.1 (6.3) | 1.4 (0.9) |
| **DAS28-CRP**  mean (SEM) | 2.5 (0.3) | **1.7 (0.3)** | 1.5 (0.2) | 1.2 (0.2) |
| **JADAS10-CRP**  mean (SEM) | 6.0 (1.8) | 3.7 (2.0) | 1.4 (0.9) | 0 (0) |

Significant results (p<0.05) are written in bold. Systemic forms (n=3) were excluded from the analysis of JADAS10 scores, as this score is not validated in these forms. TJC, tender joint count; SJC, swollen joint count; VAS, disease evaluation on a visual analogue scale; CHAQ, childhood health assessment questionnaire; CRP, C-reactive protein.
